# Supplementary material for: Fpr1, a primary target of rapamycin, functions as a transcription factor for ribosomal protein genes cooperatively with Hmo1 in Saccharomyces cerevisiae
Source: PLoS Genet. 2020 Jun 30;16(6):e1008865. doi: 10.1371/journal.pgen.1008865 (PMC7357790; doi:10.1371/journal.pgen.1008865)
Supplement: S15 Table — (XLSX) [file pgen.1008865.s024.xlsx]

## Sheet: Sheet1
S15 Table. ChIP Data for Fig 5F
RPL25
1st											RPL25
	strain	genotype	precipitated protein	antibody	region	primer	IP	input	IP/input		strain	precipitated protein	antibody	1st	2nd	3rd	Average	STDEV
1	YKK792	WT	FAP-FLAG	no antibody	RPL25	KK640&KK641	1	37.2	0.0268817		WT	FAP-FLAG	no antibody	0.0268817	0.0401606	0.0362774	0.0344399	0.00682749
2	YKK792	WT	FAP-FLAG	α-FLAG	RPL25	KK640&KK641	0.38	37.2	0.0102151		WT	FAP-FLAG	α-FLAG	0.0102151	0.0157028	0.0143431	0.0134203	0.00285788
3	YKK794	fpr1Δ	FAP-FLAG	α-FLAG	RPL25	KK640&KK641	0.364	39.4	0.00923858		fpr1Δ	FAP-FLAG	α-FLAG	0.00923858	0.0159004	0.0641104	0.0297498	0.029943
4	YKK1074	WT	RAP1-FLAG	no antibody	RPL25	KK640&KK641	1	53.8	0.0185874
5	YKK1074	WT	RAP1-FLAG	α-FLAG	RPL25	KK640&KK641	1821	53.8	33.8476		WT	RAP1-FLAG	no antibody	0.0185874	0.0253695	0.02074	0.0215656	0.00346561
6	YKK1072	fpr1Δ	RAP1-FLAG	α-FLAG	RPL25	KK640&KK641	1523	33.4	45.5988		WT	RAP1-FLAG	α-FLAG	33.8476	50.0493	37.1247	40.3405	8.56619
7	YKK792	WT	FAP-FLAG	input	RPL25	KK640&KK641	37.2				fpr1Δ	RAP1-FLAG	α-FLAG	45.5988	65.1709	52.1933	54.321	9.95804
8	YKK794	fpr1Δ	FAP-FLAG	input	RPL25	KK640&KK641	39.4
9	YKK1074	WT	RAP1-FLAG	input	RPL25	KK640&KK641	53.8
10	YKK1072	fpr1Δ	RAP1-FLAG	input	RPL25	KK640&KK641	33.4
2nd
	strain	genotype	precipitated protein	antibody	region	primer	IP	input	IP/input
1	YKK792	WT	FAP-FLAG	no antibody	RPL25	KK640&KK641	1	24.9	0.0401606
2	YKK792	WT	FAP-FLAG	α-FLAG	RPL25	KK640&KK641	0.391	24.9	0.0157028
3	YKK794	fpr1Δ	FAP-FLAG	α-FLAG	RPL25	KK640&KK641	0.415	26.1	0.0159004
4	YKK1074	WT	RAP1-FLAG	no antibody	RPL25	KK640&KK641	1.03	40.6	0.0253695
5	YKK1074	WT	RAP1-FLAG	α-FLAG	RPL25	KK640&KK641	2032	40.6	50.0493
6	YKK1072	fpr1Δ	RAP1-FLAG	α-FLAG	RPL25	KK640&KK641	1525	23.4	65.1709
7	YKK792	WT	FAP-FLAG	input	RPL25	KK640&KK641	24.9
8	YKK794	fpr1Δ	FAP-FLAG	input	RPL25	KK640&KK641	26.1
9	YKK1074	WT	RAP1-FLAG	input	RPL25	KK640&KK641	40.6
10	YKK1072	fpr1Δ	RAP1-FLAG	input	RPL25	KK640&KK641	23.4
3rd
	strain	genotype	precipitated protein	antibody	region	primer	IP	input	IP/input
1	YKK792	WT	FAP-FLAG	no antibody	RPL25	KK640&KK641	0.994	27.4	0.0362774
2	YKK792	WT	FAP-FLAG	α-FLAG	RPL25	KK640&KK641	0.393	27.4	0.0143431
3	YKK794	fpr1Δ	FAP-FLAG	α-FLAG	RPL25	KK640&KK641	2.09	32.6	0.0641104
4	YKK1074	WT	RAP1-FLAG	no antibody	RPL25	KK640&KK641	0.981	47.3	0.02074
5	YKK1074	WT	RAP1-FLAG	α-FLAG	RPL25	KK640&KK641	1756	47.3	37.1247
6	YKK1072	fpr1Δ	RAP1-FLAG	α-FLAG	RPL25	KK640&KK641	1404	26.9	52.1933
7	YKK792	WT	FAP-FLAG	input	RPL25	KK640&KK641	27.4
8	YKK794	fpr1Δ	FAP-FLAG	input	RPL25	KK640&KK641	32.6
9	YKK1074	WT	RAP1-FLAG	input	RPL25	KK640&KK641	47.3
10	YKK1072	fpr1Δ	RAP1-FLAG	input	RPL25	KK640&KK641	26.9
							95℃
							95℃
							55 ℃
							72℃
												24.7	#REF!
												172	#REF!
												38.9	#REF!
												200	#REF!
DNA
oligo
ROX
DDW
KAPA
