# Supplementary material for: Fpr1, a primary target of rapamycin, functions as a transcription factor for ribosomal protein genes cooperatively with Hmo1 in Saccharomyces cerevisiae
Source: PLoS Genet. 2020 Jun 30;16(6):e1008865. doi: 10.1371/journal.pgen.1008865 (PMC7357790; doi:10.1371/journal.pgen.1008865)
Supplement: S17 Table — (XLSX) [file pgen.1008865.s026.xlsx]

## Sheet: Sheet1
S17 Table. ChIP Data for S1 Fig
RPL25												RPL25
1st												strain	precipitated protein	antibody	1st	2nd	3rd	1st(normalized)	2nd(normalized)	3rd(normalized)	Average	STDEV
	strain	genotype	plasmid	precipitated protein	antibody	region	primer	IP	input	IP/input		fpr1Δ	Fpr1(no tag)	α-PA	0.00510204	0.00161458	0.00298974	0.0257308	0.00306247	0.00825419	0.0123491	0.011876
1	YKK463	fpr1Δ	pKM304	Fpr1(no tag)	α-PA	RPL25	KK640&KK641	1	196	0.00510204		fpr1Δ	PA-Fpr1	α-PA	0.198286	0.527215	0.362209	1	1	1	1	0
2	YKK463	fpr1Δ	pKM738	PA-Fpr1	α-PA	RPL25	KK640&KK641	34.7	175	0.198286
3	YKK463	fpr1Δ	pKM304	Fpr1(no tag)	input	RPL25	KK640&KK641	196				RPS25A
4	YKK463	fpr1Δ	pKM738	PA-Fpr1	input	RPL25	KK640&KK641	175				strain	precipitated protein	antibody	1st	2nd	3rd	1st(normalized)	2nd(normalized)	3rd(normalized)	Average	STDEV
												fpr1Δ	Fpr1(no tag)	α-PA	0.00444444	0.00137164	0.00291375	0.132922	0.00982852	0.0445633	0.062438	0.0634637
2nd												fpr1Δ	PA-Fpr1	α-PA	0.0334364	0.139557	0.0653846	1	1	1	1	0
	strain	genotype	plasmid	precipitated protein	antibody	region	primer	IP	input	IP/input
1	YKK463	fpr1Δ	pKM304	Fpr1(no tag)	α-PA	RPL25	KK640&KK641	0.31	192	0.00161458
2	YKK463	fpr1Δ	pKM738	PA-Fpr1	α-PA	RPL25	KK640&KK641	83.3	158	0.527215
3	YKK463	fpr1Δ	pKM304	Fpr1(no tag)	input	RPL25	KK640&KK641	192
4	YKK463	fpr1Δ	pKM738	PA-Fpr1	input	RPL25	KK640&KK641	158
3rd
	strain	genotype	plasmid	precipitated protein	antibody	region	primer	IP	input	IP/input
1	YKK463	fpr1Δ	pKM304	Fpr1(no tag)	α-PA	RPL25	KK640&KK641	0.583	195	0.00298974
2	YKK463	fpr1Δ	pKM738	PA-Fpr1	α-PA	RPL25	KK640&KK641	62.3	172	0.362209
3	YKK463	fpr1Δ	pKM304	Fpr1(no tag)	input	RPL25	KK640&KK641	195
4	YKK463	fpr1Δ	pKM738	PA-Fpr1	input	RPL25	KK640&KK641	172
RPS25A
1st
	strain	genotype	plasmid	precipitated protein	antibody	region	primer	IP	input	IP/input
1	YKK463	fpr1Δ	pKM304	Fpr1(no tag)	α-PA	RPS25A	TK10675&KK10676	0.156	35.1	0.00444444
2	YKK463	fpr1Δ	pKM738	PA-Fpr1	α-PA	RPS25A	TK10675&KK10676	0.973	29.1	0.0334364
3	YKK463	fpr1Δ	pKM304	Fpr1(no tag)	input	RPS25A	TK10675&KK10676	35.1
4	YKK463	fpr1Δ	pKM738	PA-Fpr1	input	RPS25A	TK10675&KK10676	29.1
2nd
	strain	genotype	plasmid	precipitated protein	antibody	region	primer	IP	input	IP/input
1	YKK463	fpr1Δ	pKM304	Fpr1(no tag)	α-PA	RPS25A	TK10675&KK10676	0.0561	40.9	0.00137164
2	YKK463	fpr1Δ	pKM738	PA-Fpr1	α-PA	RPS25A	TK10675&KK10676	4.41	31.6	0.139557
3	YKK463	fpr1Δ	pKM304	Fpr1(no tag)	input	RPS25A	TK10675&KK10676	40.9
4	YKK463	fpr1Δ	pKM738	PA-Fpr1	input	RPS25A	TK10675&KK10676	31.6
3rd
	strain	genotype	plasmid	precipitated protein	antibody	region	primer	IP	input	IP/input
1	YKK463	fpr1Δ	pKM304	Fpr1(no tag)	α-PA	RPS25A	TK10675&KK10676	0.125	42.9	0.00291375
2	YKK463	fpr1Δ	pKM738	PA-Fpr1	α-PA	RPS25A	TK10675&KK10676	2.21	33.8	0.0653846
3	YKK463	fpr1Δ	pKM304	Fpr1(no tag)	input	RPS25A	TK10675&KK10676	42.9
4	YKK463	fpr1Δ	pKM738	PA-Fpr1	input	RPS25A	TK10675&KK10676	33.8
