# Supplementary material for: Fpr1, a primary target of rapamycin, functions as a transcription factor for ribosomal protein genes cooperatively with Hmo1 in Saccharomyces cerevisiae
Source: PLoS Genet. 2020 Jun 30;16(6):e1008865. doi: 10.1371/journal.pgen.1008865 (PMC7357790; doi:10.1371/journal.pgen.1008865)
Supplement: S19 Table — (XLSX) [file pgen.1008865.s028.xlsx]

## Sheet: Sheet1
S19 Table. ChIP Data for S5 Fig B
1st
	strain	genotype	plasmid	Fpr1 protein	precipitated protein	drug	antibody	region	primer	IP	input	IP/input		RPS25A
1	YKK1214	fpr1Δ	pKM304	Fpr1(no tag)	Fhl1-FLAG	no drug	no antibody	RPS25A	TK10675&KK10676	1	1414	0.000707214		strain	Fpr1	precipitated protein	drug	antibody	1st	2nd	3rd	1st(normalized)	2nd(normalized)	3rd(normalized)	Average	STDEV
2	YKK1214	fpr1Δ	pKM304	Fpr1(no tag)	Fhl1-FLAG	no drug	α-FLAG	RPS25A	TK10675&KK10676	2429	1414	1.71782		fpr1Δ	Fpr1(no tag)	Fhl1-FLAG	no drug	no antibody	0.000707214	0.00606557	0.0030303	0.000411692	0.004	0.000308356	0.00157335	0.00210218
3	YKK1214	fpr1Δ	pKM304	Fpr1(no tag)	Fhl1-FLAG	IAA 0.5mM	α-FLAG	RPS25A	TK10675&KK10676	2230	1174	1.89949		fpr1Δ	Fpr1(no tag)	Fhl1-FLAG	no drug	α-FLAG	1.71782	1.51639	9.82727	1	1	1	1	0
4	YKK1214	fpr1Δ	pKM830	Fpr1-miniAID	Fhl1-FLAG	no drug	α-FLAG	RPS25A	TK10675&KK10676	768	1476	0.520325		fpr1Δ	Fpr1(no tag)	Fhl1-FLAG	IAA 0.5mM	α-FLAG	1.89949	1.24884	7.61538	1.10575	0.823558	0.774924	0.901412	0.178629
5	YKK1214	fpr1Δ	pKM830	Fpr1-miniAID	Fhl1-FLAG	IAA 0.5mM	α-FLAG	RPS25A	TK10675&KK10676	408	1294	0.315301		fpr1Δ	Fpr1-miniAID	Fhl1-FLAG	no drug	α-FLAG	0.520325	0.641694	2.54921	0.302898	0.423171	0.259401	0.32849	0.0848313
6	YKK1214	fpr1Δ	pKM304	Fpr1(no tag)	Fhl1-FLAG	no drug	input	RPS25A	TK10675&KK10676	1414				fpr1Δ	Fpr1-miniAID	Fhl1-FLAG	IAA 0.5mM	α-FLAG	0.315301	0.277966	0.723602	0.183547	0.183307	0.0736321	0.146829	0.0633904
7	YKK1214	fpr1Δ	pKM304	Fpr1(no tag)	Fhl1-FLAG	IAA 0.5mM	input	RPS25A	TK10675&KK10676	1174
8	YKK1214	fpr1Δ	pKM830	Fpr1-miniAID	Fhl1-FLAG	no drug	input	RPS25A	TK10675&KK10676	1476				RPS30B
9	YKK1214	fpr1Δ	pKM830	Fpr1-miniAID	Fhl1-FLAG	IAA 0.5mM	input	RPS25A	TK10675&KK10676	1294				strain	Fpr1	precipitated protein	drug	antibody	1st	2nd	3rd	1st(normalized)	2nd(normalized)	3rd(normalized)	Average	STDEV
10	YKK1214	fpr1Δ	pKM304	Fpr1(no tag)	Fhl1-FLAG	no drug	no antibody	RPS30B	KK1026&KK1027	2.28	5343	0.000426727		fpr1Δ	Fpr1(no tag)	Fhl1-FLAG	no drug	no antibody	0.000426727	0.0041557	0.00246322	0.000132558	0.00144048	0.000476821	0.000683285	0.000677962
11	YKK1214	fpr1Δ	pKM304	Fpr1(no tag)	Fhl1-FLAG	no drug	α-FLAG	RPS30B	KK1026&KK1027	17200	5343	3.21917		fpr1Δ	Fpr1(no tag)	Fhl1-FLAG	no drug	α-FLAG	3.21917	2.88495	5.16593	1	1	1	1	0
12	YKK1214	fpr1Δ	pKM304	Fpr1(no tag)	Fhl1-FLAG	IAA 0.5mM	α-FLAG	RPS30B	KK1026&KK1027	16700	4787	3.48861		fpr1Δ	Fpr1(no tag)	Fhl1-FLAG	IAA 0.5mM	α-FLAG	3.48861	2.6793	5.54955	1.0837	0.928718	1.07426	1.02889	0.0868829
13	YKK1214	fpr1Δ	pKM830	Fpr1-miniAID	Fhl1-FLAG	no drug	α-FLAG	RPS30B	KK1026&KK1027	7640	5594	1.36575		fpr1Δ	Fpr1-miniAID	Fhl1-FLAG	no drug	α-FLAG	1.36575	1.44499	2.67898	0.424256	0.500874	0.518586	0.481238	0.0501369
14	YKK1214	fpr1Δ	pKM830	Fpr1-miniAID	Fhl1-FLAG	IAA 0.5mM	α-FLAG	RPS30B	KK1026&KK1027	3194	4758	0.67129		fpr1Δ	Fpr1-miniAID	Fhl1-FLAG	IAA 0.5mM	α-FLAG	0.67129	0.786838	0.860465	0.208529	0.272739	0.166566	0.215945	0.053474
15	YKK1214	fpr1Δ	pKM304	Fpr1(no tag)	Fhl1-FLAG	no drug	input	RPS30B	KK1026&KK1027	5343
16	YKK1214	fpr1Δ	pKM304	Fpr1(no tag)	Fhl1-FLAG	IAA 0.5mM	input	RPS30B	KK1026&KK1027	4787				RPS5
17	YKK1214	fpr1Δ	pKM830	Fpr1-miniAID	Fhl1-FLAG	no drug	input	RPS30B	KK1026&KK1027	5594				strain	Fpr1	precipitated protein	drug	antibody	1st	2nd	3rd	1st(normalized)	2nd(normalized)	3rd(normalized)	Average	STDEV
18	YKK1214	fpr1Δ	pKM830	Fpr1-miniAID	Fhl1-FLAG	IAA 0.5mM	input	RPS30B	KK1026&KK1027	4758				fpr1Δ	Fpr1(no tag)	Fhl1-FLAG	no drug	no antibody	0.00326797	0.00472504	0.00534623	0.00039185	0.000820971	0.000475113	0.000562644	0.000227558
19	YKK1214	fpr1Δ	pKM304	Fpr1(no tag)	Fhl1-FLAG	no drug	no antibody	RPS5	TK9174&KK9292	1	306	0.00326797		fpr1Δ	Fpr1(no tag)	Fhl1-FLAG	no drug	α-FLAG	8.33987	5.75543	11.2525	1	1	1	1	0
20	YKK1214	fpr1Δ	pKM304	Fpr1(no tag)	Fhl1-FLAG	no drug	α-FLAG	RPS5	TK9174&KK9292	2552	306	8.33987		fpr1Δ	Fpr1(no tag)	Fhl1-FLAG	IAA 0.5mM	α-FLAG	7.58209	6.1664	10.7161	0.909138	1.07141	0.952324	0.977623	0.0840403
21	YKK1214	fpr1Δ	pKM304	Fpr1(no tag)	Fhl1-FLAG	IAA 0.5mM	α-FLAG	RPS5	TK9174&KK9292	2032	268	7.58209		fpr1Δ	Fpr1-miniAID	Fhl1-FLAG	no drug	α-FLAG	5.74481	6.59846	11.1786	0.688837	1.14648	0.99343	0.942914	0.232964
22	YKK1214	fpr1Δ	pKM830	Fpr1-miniAID	Fhl1-FLAG	no drug	α-FLAG	RPS5	TK9174&KK9292	1936	337	5.74481		fpr1Δ	Fpr1-miniAID	Fhl1-FLAG	IAA 0.5mM	α-FLAG	6.88015	7.0596	10.1879	0.824971	1.2266	0.905383	0.985651	0.212505
23	YKK1214	fpr1Δ	pKM830	Fpr1-miniAID	Fhl1-FLAG	IAA 0.5mM	α-FLAG	RPS5	TK9174&KK9292	1837	267	6.88015
24	YKK1214	fpr1Δ	pKM304	Fpr1(no tag)	Fhl1-FLAG	no drug	input	RPS5	TK9174&KK9292	306
25	YKK1214	fpr1Δ	pKM304	Fpr1(no tag)	Fhl1-FLAG	IAA 0.5mM	input	RPS5	TK9174&KK9292	268
26	YKK1214	fpr1Δ	pKM830	Fpr1-miniAID	Fhl1-FLAG	no drug	input	RPS5	TK9174&KK9292	337
27	YKK1214	fpr1Δ	pKM830	Fpr1-miniAID	Fhl1-FLAG	IAA 0.5mM	input	RPS5	TK9174&KK9292	267
2nd
	strain	genotype	plasmid	Fpr1 protein	precipitated protein	drug	antibody	region	primer	IP	input	IP/input
1	YKK1214	fpr1Δ	pKM304	Fpr1(no tag)	Fhl1-FLAG	no drug	no antibody	RPS25A	TK10675&KK10676	2.22	366	0.00606557
2	YKK1214	fpr1Δ	pKM304	Fpr1(no tag)	Fhl1-FLAG	no drug	α-FLAG	RPS25A	TK10675&KK10676	555	366	1.51639
3	YKK1214	fpr1Δ	pKM304	Fpr1(no tag)	Fhl1-FLAG	IAA 0.5mM	α-FLAG	RPS25A	TK10675&KK10676	537	430	1.24884
4	YKK1214	fpr1Δ	pKM830	Fpr1-miniAID	Fhl1-FLAG	no drug	α-FLAG	RPS25A	TK10675&KK10676	197	307	0.641694
5	YKK1214	fpr1Δ	pKM830	Fpr1-miniAID	Fhl1-FLAG	IAA 0.5mM	α-FLAG	RPS25A	TK10675&KK10676	82	295	0.277966
6	YKK1214	fpr1Δ	pKM304	Fpr1(no tag)	Fhl1-FLAG	no drug	input	RPS25A	TK10675&KK10676	366
7	YKK1214	fpr1Δ	pKM304	Fpr1(no tag)	Fhl1-FLAG	IAA 0.5mM	input	RPS25A	TK10675&KK10676	430
8	YKK1214	fpr1Δ	pKM830	Fpr1-miniAID	Fhl1-FLAG	no drug	input	RPS25A	TK10675&KK10676	307
9	YKK1214	fpr1Δ	pKM830	Fpr1-miniAID	Fhl1-FLAG	IAA 0.5mM	input	RPS25A	TK10675&KK10676	295
10	YKK1214	fpr1Δ	pKM304	Fpr1(no tag)	Fhl1-FLAG	no drug	no antibody	RPS30B	KK1026&KK1027	7.26	1747	0.0041557
11	YKK1214	fpr1Δ	pKM304	Fpr1(no tag)	Fhl1-FLAG	no drug	α-FLAG	RPS30B	KK1026&KK1027	5040	1747	2.88495
12	YKK1214	fpr1Δ	pKM304	Fpr1(no tag)	Fhl1-FLAG	IAA 0.5mM	α-FLAG	RPS30B	KK1026&KK1027	4595	1715	2.6793
13	YKK1214	fpr1Δ	pKM830	Fpr1-miniAID	Fhl1-FLAG	no drug	α-FLAG	RPS30B	KK1026&KK1027	2049	1418	1.44499
14	YKK1214	fpr1Δ	pKM830	Fpr1-miniAID	Fhl1-FLAG	IAA 0.5mM	α-FLAG	RPS30B	KK1026&KK1027	1100	1398	0.786838
15	YKK1214	fpr1Δ	pKM304	Fpr1(no tag)	Fhl1-FLAG	no drug	input	RPS30B	KK1026&KK1027	1747
16	YKK1214	fpr1Δ	pKM304	Fpr1(no tag)	Fhl1-FLAG	IAA 0.5mM	input	RPS30B	KK1026&KK1027	1715
17	YKK1214	fpr1Δ	pKM830	Fpr1-miniAID	Fhl1-FLAG	no drug	input	RPS30B	KK1026&KK1027	1418
18	YKK1214	fpr1Δ	pKM830	Fpr1-miniAID	Fhl1-FLAG	IAA 0.5mM	input	RPS30B	KK1026&KK1027	1398
19	YKK1214	fpr1Δ	pKM304	Fpr1(no tag)	Fhl1-FLAG	no drug	no antibody	RPS5	TK9174&KK9292	6.53	1382	0.00472504
20	YKK1214	fpr1Δ	pKM304	Fpr1(no tag)	Fhl1-FLAG	no drug	α-FLAG	RPS5	TK9174&KK9292	7954	1382	5.75543
21	YKK1214	fpr1Δ	pKM304	Fpr1(no tag)	Fhl1-FLAG	IAA 0.5mM	α-FLAG	RPS5	TK9174&KK9292	7708	1250	6.1664
22	YKK1214	fpr1Δ	pKM830	Fpr1-miniAID	Fhl1-FLAG	no drug	α-FLAG	RPS5	TK9174&KK9292	5998	909	6.59846
23	YKK1214	fpr1Δ	pKM830	Fpr1-miniAID	Fhl1-FLAG	IAA 0.5mM	α-FLAG	RPS5	TK9174&KK9292	6396	906	7.0596
24	YKK1214	fpr1Δ	pKM304	Fpr1(no tag)	Fhl1-FLAG	no drug	input	RPS5	TK9174&KK9292	1382
25	YKK1214	fpr1Δ	pKM304	Fpr1(no tag)	Fhl1-FLAG	IAA 0.5mM	input	RPS5	TK9174&KK9292	1250
26	YKK1214	fpr1Δ	pKM830	Fpr1-miniAID	Fhl1-FLAG	no drug	input	RPS5	TK9174&KK9292	909
27	YKK1214	fpr1Δ	pKM830	Fpr1-miniAID	Fhl1-FLAG	IAA 0.5mM	input	RPS5	TK9174&KK9292	906
3rd
	strain	genotype	plasmid	Fpr1 protein	precipitated protein	drug	antibody	region	primer	IP	input	IP/input
1	YKK1214	fpr1Δ	pKM304	Fpr1(no tag)	Fhl1-FLAG	no drug	no antibody	RPS25A	TK10675&KK10676	1	330	0.0030303
2	YKK1214	fpr1Δ	pKM304	Fpr1(no tag)	Fhl1-FLAG	no drug	α-FLAG	RPS25A	TK10675&KK10676	3243	330	9.82727
3	YKK1214	fpr1Δ	pKM304	Fpr1(no tag)	Fhl1-FLAG	IAA 0.5mM	α-FLAG	RPS25A	TK10675&KK10676	3663	481	7.61538
4	YKK1214	fpr1Δ	pKM830	Fpr1-miniAID	Fhl1-FLAG	no drug	α-FLAG	RPS25A	TK10675&KK10676	803	315	2.54921
5	YKK1214	fpr1Δ	pKM830	Fpr1-miniAID	Fhl1-FLAG	IAA 0.5mM	α-FLAG	RPS25A	TK10675&KK10676	233	322	0.723602
6	YKK1214	fpr1Δ	pKM304	Fpr1(no tag)	Fhl1-FLAG	no drug	input	RPS25A	TK10675&KK10676	330
7	YKK1214	fpr1Δ	pKM304	Fpr1(no tag)	Fhl1-FLAG	IAA 0.5mM	input	RPS25A	TK10675&KK10676	481
8	YKK1214	fpr1Δ	pKM830	Fpr1-miniAID	Fhl1-FLAG	no drug	input	RPS25A	TK10675&KK10676	315
9	YKK1214	fpr1Δ	pKM830	Fpr1-miniAID	Fhl1-FLAG	IAA 0.5mM	input	RPS25A	TK10675&KK10676	322
10	YKK1214	fpr1Δ	pKM304	Fpr1(no tag)	Fhl1-FLAG	no drug	no antibody	RPS30B	KK1026&KK1027	7.2	2923	0.00246322
11	YKK1214	fpr1Δ	pKM304	Fpr1(no tag)	Fhl1-FLAG	no drug	α-FLAG	RPS30B	KK1026&KK1027	15100	2923	5.16593
12	YKK1214	fpr1Δ	pKM304	Fpr1(no tag)	Fhl1-FLAG	IAA 0.5mM	α-FLAG	RPS30B	KK1026&KK1027	15400	2775	5.54955
13	YKK1214	fpr1Δ	pKM830	Fpr1-miniAID	Fhl1-FLAG	no drug	α-FLAG	RPS30B	KK1026&KK1027	6601	2464	2.67898
14	YKK1214	fpr1Δ	pKM830	Fpr1-miniAID	Fhl1-FLAG	IAA 0.5mM	α-FLAG	RPS30B	KK1026&KK1027	2109	2451	0.860465
15	YKK1214	fpr1Δ	pKM304	Fpr1(no tag)	Fhl1-FLAG	no drug	input	RPS30B	KK1026&KK1027	2923
16	YKK1214	fpr1Δ	pKM304	Fpr1(no tag)	Fhl1-FLAG	IAA 0.5mM	input	RPS30B	KK1026&KK1027	2775
17	YKK1214	fpr1Δ	pKM830	Fpr1-miniAID	Fhl1-FLAG	no drug	input	RPS30B	KK1026&KK1027	2464
18	YKK1214	fpr1Δ	pKM830	Fpr1-miniAID	Fhl1-FLAG	IAA 0.5mM	input	RPS30B	KK1026&KK1027	2451
19	YKK1214	fpr1Δ	pKM304	Fpr1(no tag)	Fhl1-FLAG	no drug	no antibody	RPS5	TK9174&KK9292	10.5	1964	0.00534623
20	YKK1214	fpr1Δ	pKM304	Fpr1(no tag)	Fhl1-FLAG	no drug	α-FLAG	RPS5	TK9174&KK9292	22100	1964	11.2525
21	YKK1214	fpr1Δ	pKM304	Fpr1(no tag)	Fhl1-FLAG	IAA 0.5mM	α-FLAG	RPS5	TK9174&KK9292	21400	1997	10.7161
22	YKK1214	fpr1Δ	pKM830	Fpr1-miniAID	Fhl1-FLAG	no drug	α-FLAG	RPS5	TK9174&KK9292	18400	1646	11.1786
23	YKK1214	fpr1Δ	pKM830	Fpr1-miniAID	Fhl1-FLAG	IAA 0.5mM	α-FLAG	RPS5	TK9174&KK9292	14100	1384	10.1879
24	YKK1214	fpr1Δ	pKM304	Fpr1(no tag)	Fhl1-FLAG	no drug	input	RPS5	TK9174&KK9292	1964
25	YKK1214	fpr1Δ	pKM304	Fpr1(no tag)	Fhl1-FLAG	IAA 0.5mM	input	RPS5	TK9174&KK9292	1997
26	YKK1214	fpr1Δ	pKM830	Fpr1-miniAID	Fhl1-FLAG	no drug	input	RPS5	TK9174&KK9292	1646
27	YKK1214	fpr1Δ	pKM830	Fpr1-miniAID	Fhl1-FLAG	IAA 0.5mM	input	RPS5	TK9174&KK9292	1384
